# Supplementary material
Source: PubMed Central journal article supplement (PMC4201037)
Supplement: NIHMS632674-supplement-SI.pdf [file NIHMS632674-supplement-SI.pdf]

The PDB co-ordinates of the six-unique rotational isomeric states portrayed in Figure 3.

$\alpha\alpha$

|      |    |    |     |   |        |        |        |
|------|----|----|-----|---|--------|--------|--------|
| ATOM | 1  | H1 | GOL | 1 | -2.473 | -0.733 | -1.065 |
| ATOM | 2  | O1 | GOL | 1 | -2.190 | -1.431 | -0.470 |
| ATOM | 3  | C1 | GOL | 1 | -0.758 | -1.207 | -0.358 |
| ATOM | 4  | H2 | GOL | 1 | -0.361 | -2.014 | 0.260  |
| ATOM | 5  | H3 | GOL | 1 | -0.261 | -1.331 | -1.323 |
| ATOM | 6  | C2 | GOL | 1 | -0.354 | 0.213  | 0.231  |
| ATOM | 7  | H4 | GOL | 1 | -0.859 | 0.353  | 1.190  |
| ATOM | 8  | O2 | GOL | 1 | -0.770 | 1.221  | -0.717 |
| ATOM | 9  | H5 | GOL | 1 | -0.950 | 2.046  | -0.261 |
| ATOM | 10 | C3 | GOL | 1 | 1.195  | 0.272  | 0.404  |
| ATOM | 11 | H6 | GOL | 1 | 1.590  | 0.360  | -0.611 |
| ATOM | 12 | H7 | GOL | 1 | 1.679  | -0.638 | 0.763  |
| ATOM | 13 | O3 | GOL | 1 | 1.789  | 1.422  | 1.080  |
| ATOM | 14 | H8 | GOL | 1 | 2.726  | 1.464  | 0.874  |
| TER  |    |    |     |   |        |        |        |

$\alpha\beta$

|      |    |    |     |   |        |        |        |
|------|----|----|-----|---|--------|--------|--------|
| ATOM | 1  | H1 | GOL | 1 | -2.215 | -1.404 | 0.356  |
| ATOM | 2  | O1 | GOL | 1 | -1.458 | -1.910 | 0.053  |
| ATOM | 3  | C1 | GOL | 1 | -0.259 | -1.144 | 0.377  |
| ATOM | 4  | H2 | GOL | 1 | -0.328 | -0.862 | 1.430  |
| ATOM | 5  | H3 | GOL | 1 | 0.628  | -1.755 | 0.196  |
| ATOM | 6  | C2 | GOL | 1 | -0.130 | 0.135  | -0.502 |
| ATOM | 7  | H4 | GOL | 1 | -1.086 | 0.658  | -0.572 |
| ATOM | 8  | O2 | GOL | 1 | 0.166  | -0.270 | -1.825 |
| ATOM | 9  | H5 | GOL | 1 | -0.428 | 0.060  | -2.503 |
| ATOM | 10 | C3 | GOL | 1 | 0.939  | 1.119  | 0.099  |
| ATOM | 11 | H6 | GOL | 1 | 0.964  | 1.940  | -0.619 |
| ATOM | 12 | H7 | GOL | 1 | 1.947  | 0.702  | 0.150  |
| ATOM | 13 | O3 | GOL | 1 | 0.393  | 1.600  | 1.331  |
| ATOM | 14 | H8 | GOL | 1 | 0.862  | 1.135  | 2.029  |
| TER  |    |    |     |   |        |        |        |

$\alpha\gamma$

|      |    |    |     |   |        |        |        |
|------|----|----|-----|---|--------|--------|--------|
| ATOM | 1  | H1 | GOL | 1 | 2.284  | -1.600 | 0.130  |
| ATOM | 2  | O1 | GOL | 1 | 1.887  | -1.434 | -0.728 |
| ATOM | 3  | C1 | GOL | 1 | 1.093  | -0.234 | -0.686 |
| ATOM | 4  | H2 | GOL | 1 | 1.765  | 0.528  | -0.286 |
| ATOM | 5  | H3 | GOL | 1 | 0.864  | -0.017 | -1.731 |
| ATOM | 6  | C2 | GOL | 1 | -0.209 | -0.368 | 0.232  |
| ATOM | 7  | H4 | GOL | 1 | 0.062  | -0.830 | 1.184  |
| ATOM | 8  | O2 | GOL | 1 | -1.162 | -1.171 | -0.431 |
| ATOM | 9  | H5 | GOL | 1 | -0.997 | -2.054 | -0.093 |
| ATOM | 10 | C3 | GOL | 1 | -0.869 | 0.950  | 0.667  |
| ATOM | 11 | H6 | GOL | 1 | -0.349 | 1.289  | 1.565  |
| ATOM | 12 | H7 | GOL | 1 | -1.871 | 0.610  | 0.937  |
| ATOM | 13 | O3 | GOL | 1 | -0.814 | 1.965  | -0.382 |
| ATOM | 14 | H8 | GOL | 1 | -1.685 | 2.368  | -0.373 |
| TER  |    |    |     |   |        |        |        |

$\beta\beta$ 

|      |    |    |     |   |        |        |        |
|------|----|----|-----|---|--------|--------|--------|
| ATOM | 1  | H1 | GOL | 1 | -0.119 | -2.309 | -0.581 |
| ATOM | 2  | O1 | GOL | 1 | 0.066  | -2.085 | 0.334  |
| ATOM | 3  | C1 | GOL | 1 | -0.546 | -0.931 | 0.902  |
| ATOM | 4  | H2 | GOL | 1 | -1.602 | -0.863 | 0.635  |
| ATOM | 5  | H3 | GOL | 1 | -0.460 | -0.992 | 1.989  |
| ATOM | 6  | C2 | GOL | 1 | 0.099  | 0.399  | 0.450  |
| ATOM | 7  | H4 | GOL | 1 | 1.170  | 0.305  | 0.640  |
| ATOM | 8  | O2 | GOL | 1 | -0.333 | 1.472  | 1.348  |
| ATOM | 9  | H5 | GOL | 1 | -0.104 | 1.104  | 2.205  |
| ATOM | 10 | C3 | GOL | 1 | 0.029  | 0.811  | -1.123 |
| ATOM | 11 | H6 | GOL | 1 | 0.206  | 1.870  | -1.322 |
| ATOM | 12 | H7 | GOL | 1 | -1.002 | 0.751  | -1.479 |
| ATOM | 13 | O3 | GOL | 1 | 0.854  | 0.061  | -2.017 |
| ATOM | 14 | H8 | GOL | 1 | 1.748  | 0.409  | -1.986 |
| TER  |    |    |     |   |        |        |        |

 $\beta\gamma$ 

|      |    |    |     |   |        |        |        |
|------|----|----|-----|---|--------|--------|--------|
| ATOM | 1  | H1 | GOL | 1 | -2.248 | 1.378  | 0.052  |
| ATOM | 2  | O1 | GOL | 1 | -2.043 | 0.503  | -0.286 |
| ATOM | 3  | C1 | GOL | 1 | -0.754 | 0.541  | -1.003 |
| ATOM | 4  | H2 | GOL | 1 | -0.790 | -0.253 | -1.752 |
| ATOM | 5  | H3 | GOL | 1 | -0.632 | 1.472  | -1.562 |
| ATOM | 6  | C2 | GOL | 1 | 0.493  | 0.357  | -0.000 |
| ATOM | 7  | H4 | GOL | 1 | 0.581  | 1.299  | 0.545  |
| ATOM | 8  | O2 | GOL | 1 | 1.688  | 0.197  | -0.698 |
| ATOM | 9  | H5 | GOL | 1 | 1.973  | 0.985  | -1.168 |
| ATOM | 10 | C3 | GOL | 1 | 0.303  | -0.734 | 1.113  |
| ATOM | 11 | H6 | GOL | 1 | -0.501 | -0.390 | 1.766  |
| ATOM | 12 | H7 | GOL | 1 | 1.195  | -0.761 | 1.743  |
| ATOM | 13 | O3 | GOL | 1 | -0.009 | -2.012 | 0.545  |
| ATOM | 14 | H8 | GOL | 1 | 0.749  | -2.578 | 0.707  |
| TER  |    |    |     |   |        |        |        |

 $\gamma\gamma$ 

|      |    |    |     |   |        |        |        |
|------|----|----|-----|---|--------|--------|--------|
| ATOM | 1  | H1 | GOL | 1 | -1.165 | -1.526 | 1.066  |
| ATOM | 2  | O1 | GOL | 1 | -1.452 | -0.698 | 1.457  |
| ATOM | 3  | C1 | GOL | 1 | -0.442 | 0.320  | 1.346  |
| ATOM | 4  | H2 | GOL | 1 | -0.757 | 1.238  | 1.846  |
| ATOM | 5  | H3 | GOL | 1 | 0.332  | 0.025  | 2.058  |
| ATOM | 6  | C2 | GOL | 1 | 0.074  | 0.725  | -0.009 |
| ATOM | 7  | H4 | GOL | 1 | 0.808  | 1.523  | 0.118  |
| ATOM | 8  | O2 | GOL | 1 | -1.085 | 1.235  | -0.837 |
| ATOM | 9  | H5 | GOL | 1 | -0.702 | 1.888  | -1.427 |
| ATOM | 10 | C3 | GOL | 1 | 0.836  | -0.380 | -0.858 |
| ATOM | 11 | H6 | GOL | 1 | 1.830  | -0.604 | -0.465 |
| ATOM | 12 | H7 | GOL | 1 | 1.112  | -0.025 | -1.854 |
| ATOM | 13 | O3 | GOL | 1 | 0.043  | -1.562 | -0.953 |
| ATOM | 14 | H8 | GOL | 1 | 0.565  | -2.164 | -1.488 |
| TER  |    |    |     |   |        |        |        |

Reference 29:

Case, D. A. Darden, T. A.; Cheatham III, T. E.; Simmerling, C. L.; Wang, J.; Duke, R. E.; Lou, R.; Merz, K. M.; Wang, B.; Pearlman, D. A.; Crowley, M.; Brozell, S.; Tsui, V.; Gohlke, H.; Mongan, J.; Hornak, V.; Cui, G.; Beroza, P.; Schafmeister, P.; Caldwell, J. W.; Ross, W. S.; Kollman, P. A.; AMBER 8. University of California: San Francisco, CA: 2004.

Reference 36:

Case, D. A. Darden, T. A.; Cheatham III, T. E.; Simmerling, C. L.; Wang, J.; Duke, R. E.; Lou, R.; Merz, K. M.; Pearlman, D. A.; Crowley, M.; Walker, R. C.; Zhang, B.; Hayik, S.; Roitberg, A.; Seabra, G.; Wong, K. F.; Paesani, F.; Wu, X.; Brozell, S.; Tsui, V.; Gohlke, H.; Yang, L.; Tan, C.; Mongan, J.; Hornak, V.; Cui, G.; Beroza, P.; Mathews, D. H.; Schafmeister, C.; Ross, W. S.; Kollman, P. A.; AMBER 9. University of California: San Francisco, CA: 2006.

Reference 41:

Frisch, M. J.; Trucks, G. W.; Schlegel, H. B.; Scuseria, G. E.; Robb, M. A.; Cheeseman, J. R.; Montgomery Jr., J. A.; Vreven, T.; Kudin, K. N.; Burant, J. C.; Millam, J. M.; Iyengar, S. S.; Tomasi, J.; Barone, V.; Mennucci, B.; Cossi, M.; Scalmani, G.; Rega, N.; Petersson, G. A.; Nakatsuji, H.; Hada, M.; Ehara, M.; Toyota, K.; Fukuda, R.; Hasegawa, J.; Ishida, M.; Nakajima, T.; Honda, J.; Kitao, O.; Nakai, H.; Klene, M.; Li, X.; Knox, J. E.; Hratchian, H. P.; Cross, J. B.; Adamo, C.; Jaramillo, J.; Gomperts, R.; Stratmann, R. E.; Yazyev, O.; Austin, A. J.; Cammi, R.; Pomelli, C.; Ochterski, J. W.; Ayala, P. Y.; Morokuma, K.; Voth, G. A.; Salvador, P.; Dannenberg, J. J.; Zakrzewski, V. G.; Dapprich, S.; Daniels, A. D.; Strain, M. C.; Farkas, O.; Malick, D. K.; Rabuck, A. D.; Raghavachari, K.; Foresman, J. B.; Ortiz, J. V.; Cui, A.; Baboul, A. G.; Clifford, S.; Cioslowski, J.; Stefanov, B. B.; Liu, G.; Liashenko, A.; Piskorz, P.; Komaromi, I.; Martin, R. L.; Fox, D. J.; Keith, T.; Al-Laham, M. A.; Peng, C. Y.; Nanayakkara, A.; Challacombe, M.; Gill, P. M. W.; Johnson, B.; Chen, W.; Wong, M. W.; Gonzalez, C.; Pople, J. A.; Revision C.02 ed.; Gaussian 03. Gaussian, Inc.: Wallingford, CT, 2004.
